# Supplementary material for: In Situ Sucrose Injection for Alteration of Carbohydrate Reserve Dynamics in Grapevine
Source: MDPI journal article supplement (doi:10.3390/agronomy14030425), 2024-02-22
Supplement: s1 [file s1]

Archive with 3 entries (3 files):
- Supplementary Materials S1.pdf
- Supplementary Materials S2.pdf
- Supplementary Materials S3.pdf
