# Supplementary material for: In Situ Sucrose Injection for Alteration of Carbohydrate Reserve Dynamics in Grapevine
Source: MDPI journal article supplement (doi:10.3390/agronomy14030425), 2024-02-22
Supplement: s1 [file s1]

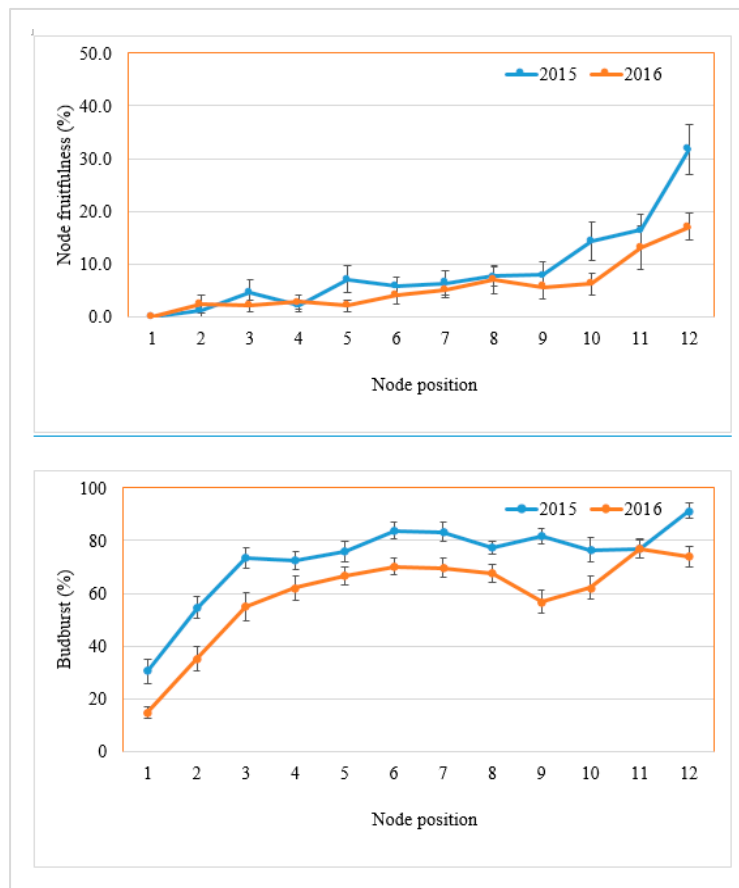

**Supplementary Materials S3.** Percent budburst and node fruitfulness as a function of node position for cv. Menindee Seedless vines in 2015 and 2016 seasons. Error bars represent  $\pm$  se of mean (n = 9) for TNC and inflorescence count.
